# Supplementary material for: Efficient macrocyclization facilitated by skeleton preorganization
Source: Royal Society of Chemistry journal article supplement (doi:10.1039/d3ra05671f), 2023-01-01
Supplement: d3ra05671f1.pdf [file d3ra05671f1.pdf]

## Supporting Information

# Efficient Macrocyclization Facilitated by Skeleton Preorganization

*Rong-Yao Xu<sup>+,a</sup>, Xiu Liu<sup>+,a</sup>, Guang Sun<sup>+,a</sup>, Zhi-Yuan Zhang,<sup>\*,a</sup> Ming Dong<sup>\*,a</sup> Liya*

*Zhao,<sup>a</sup> Si-Miao Zhang,<sup>a</sup> Xi-Yang Wang,<sup>a</sup> Hong-Xu Zhang,<sup>a</sup> Shang-Jie Yang,<sup>a</sup>*

*Xiuguang Wang,<sup>a</sup> Bin Li,<sup>a</sup> Jian Li,<sup>b</sup> and Chunju Li<sup>\*,a</sup>*

a. Tianjin Key Laboratory of Structure and Performance for Functional Molecules,

College of Chemistry, Tianjin Normal University, Tianjin 300387 (P. R. China).

b. School of Chemistry and Chemical Engineering, Henan Normal University, P. R. China.

### Corresponding Author

\*E-mail:

zzy@tjnu.edu.cn

hxydongm@tjnu.edu.cn

cjli@shu.edu.cn

## Table of Contents

|                                                                            |              |
|----------------------------------------------------------------------------|--------------|
| <b>Section I. Materials/Methods/Instrumentation .....</b>                  | <b>2</b>     |
| <b>Section II. Synthetic Protocols of PyC[2-4] and BPyC[3].....</b>        | <b>3-13</b>  |
| <b>Section III. Photophysical Properties and Single-crystal Data .....</b> | <b>14-18</b> |
| <b>Section IV. References .....</b>                                        | <b>18</b>    |

## Section I. Materials/Methods/Instrumentation

All reagents and solvents were commercially available and used without further purification, unless otherwise noted.  $^1\text{H}$  and  $^{13}\text{C}$  NMR spectra were recorded on Bruker Avance III 400 MHz. High-resolution mass spectra (HRMS) were determined on Agilent Technologies 6520 Accurate-Mass Q-TOF LC/MS in methods of Dual ESI ion source in positive ion polarity. Fluorescence spectra and lifetimes were measured on FLS1000. Photoluminescence quantum efficiencies were measured on HAMAMATSU C9920-02 by absolute method.

Suitable crystals were selected and on Bruker D8 VENTURE and Bruker SMART APEX II diffractometer. The crystals were kept at 150.15 K for PyC[2] and 170.0 K for PyCM during data collection. Using Olex2<sup>1</sup>, the structure was solved with the SHELXT<sup>2</sup> structure solution program using Intrinsic Phasing and refined with the SHELXL<sup>3</sup> refinement package using Least Squares minimisation. We constrained the thermal vibrations of C25 and C28, and averaged electron cloud density of N2, C33, C61 and C62 during the refinement of PyC[2]. Because of the absence of strong interactions between PyC[2] and solvents, the solvents were dispersed in the crystal without fixed positions, therefore solvents were removed during the refinement for better crystal data.

The geometry optimization of protonated **PyC[2]** and **PyCM** and **BPyC[3]** were performed by using Mopac2016 program<sup>4</sup> with PM7<sup>5</sup> level. The electrostatic potential (ESP) distribution were calculated by the density functional theory (DFT) calculations in B3LYP/6-31+G(d, p) level by Gaussian 09 program.

## Section II. Synthetic Protocols of PyC[2-4] and BPyC[3]

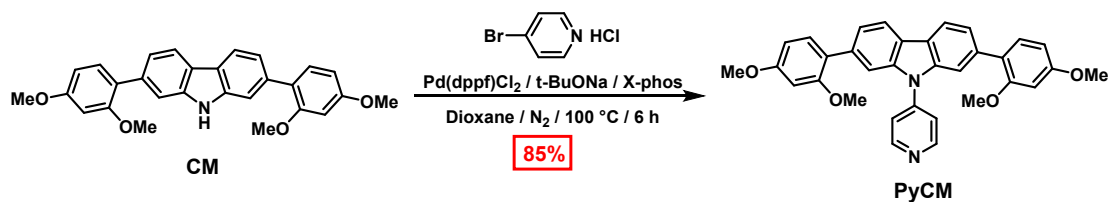

**Scheme S1.** Synthesis of pyridylcarbazole monomer (**PyCM**).

**General procedure:** Carbazole monomer **CM** (0.50 g, 1.1 mmol),<sup>6</sup> 4-bromopyridine hydrochloride (0.44 g, 2.3 mmol), Pd(dppf)Cl<sub>2</sub> (42 mg, 0.055 mmol), X-phos (0.11 g, 0.22 mmol), and *t*-BuONa (0.55 g, 5.5 mmol) were added to a dry 1,4-dioxane (50 mL), which had been degassed with N<sub>2</sub> for 15 min. The solution heated to 100 °C under N<sub>2</sub> for 6 h. Then, the reaction mixture was cooled to room temperature and the organic solvent was evaporated under vacuum. The resulting mixture was extracted with CH<sub>2</sub>Cl<sub>2</sub> (3 × 50 mL) and then washed with water and brine (60 mL). The organic layer was dried over anhydrous Na<sub>2</sub>SO<sub>4</sub> and evaporated. The residue was purified by column chromatography with CH<sub>2</sub>Cl<sub>2</sub>: EA (4:1, V:V) as eluent to afford **PyCM** as white powder (0.48 g, 85%).

**PyCM:** <sup>1</sup>H NMR (400 MHz, CDCl<sub>3</sub>): δ (ppm): 8.80 (d, *J* = 6.2 Hz, 2H), 8.11 (d, *J* = 8.1 Hz, 2H), 7.69 (s, 2H), 7.64 (d, *J* = 6.1 Hz, 2H), 7.48 (dd, *J* = 8.1, 1.3 Hz, 2H), 7.31 (d, *J* = 9.0 Hz, 2H), 6.76 – 6.40 (m, 4H), 3.87 (s, 6H), 3.82 (s, 6H). <sup>13</sup>C NMR (100 MHz, CDCl<sub>3</sub>): δ (ppm): 161.33, 158.43, 152.43, 146.72, 140.77, 137.53, 132.51, 124.81, 124.02, 123.77, 121.60, 120.78, 111.56, 105.65, 100.04, 56.60, 56.40. HRMS (*m/z*): calcd. for C<sub>33</sub>H<sub>30</sub>N<sub>2</sub>O<sub>4</sub><sup>+</sup>, 517.2122 [M+H]<sup>+</sup>; found, 517.2114.

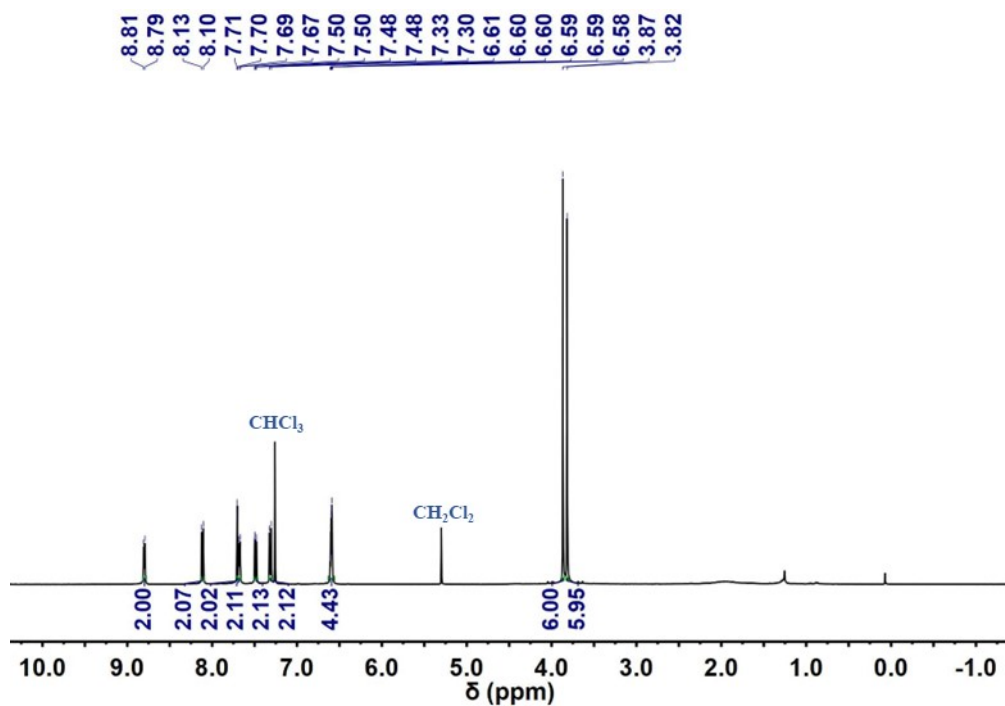

**Figure S1.** <sup>1</sup>H NMR spectrum (400 MHz, CDCl<sub>3</sub>, 298 K) of PyCM.

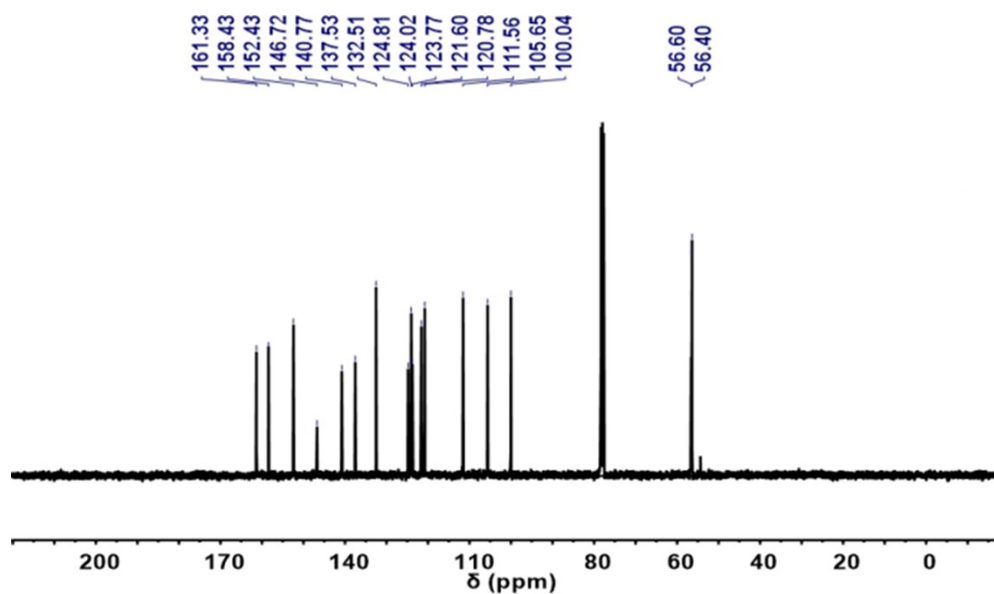

**Figure S2.** <sup>13</sup>C NMR spectrum (100 MHz, CDCl<sub>3</sub>, 298 K) of PyCM.

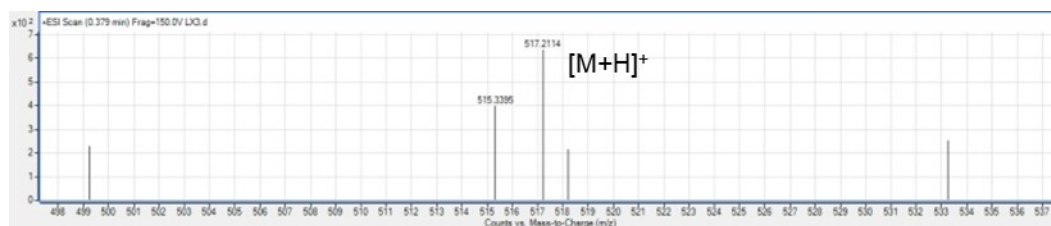

**Figure S3.** HRMS of PyCM.

### Syntheses of PyC[2-4].

To the solution of **PyCM** (0.47 g, 0.91 mmol) and paraformaldehyde (0.041 g, 1.37 mmol) in DCE (200 mL) was added TfOH (97  $\mu$ L, 1.1 mmol) and stirred at 25  $^{\circ}$ C for 8 minutes. After quenching by 100 mL water, the organic phase was separated and washed with saturated NaHCO<sub>3</sub> solution. The organic layer was dried over anhydrous Na<sub>2</sub>SO<sub>4</sub> and evaporated. The residue was purified by column chromatography with CH<sub>2</sub>Cl<sub>2</sub>: EA: MeOH (2:1:0.1, V:V:V) as eluent to afford **PyC[2]** as white powder (0.36 g, 75%) and **PyC[3-4]** can be detected in HRMS.

**PyC[2]**: <sup>1</sup>H NMR (400 MHz, TCE-*d*<sub>2</sub>):  $\delta$  (ppm): 8.63 (d, *J* = 6.1 Hz, 4H), 8.01 (d, *J* = 8.1 Hz, 4H), 7.71 (s, 4H), 7.64 – 7.49 (m, 4H), 7.44 – 7.27 (m, 4H), 7.07 (s, 4H), 6.58 (s, 4H), 3.95 (s, 4H), 3.91 (s, 12H), 3.83 (s, 12H). <sup>13</sup>C NMR (100 MHz, TCE-*d*<sub>2</sub>):  $\delta$  (ppm): 157.60, 155.54, 151.18, 145.30, 139.34, 136.52, 132.12, 122.88, 122.22, 122.10, 121.15, 120.21, 119.63, 110.66, 95.96, 56.01, 55.79, 27.46. HRMS (*m/z*): calcd. for C<sub>68</sub>H<sub>56</sub>N<sub>4</sub>O<sub>8</sub><sup>+</sup> [M]<sup>+</sup>, 1056.4098; found, 1056.4095.

**PyC[3]**: HRMS (*m/z*): calcd. for C<sub>102</sub>H<sub>84</sub>N<sub>6</sub>O<sub>12</sub><sup>+</sup> [M]<sup>+</sup>, 1585.6184; found, 1585.6177.

**PyC[4]**: HRMS (*m/z*): calcd. for C<sub>136</sub>H<sub>112</sub>N<sub>8</sub>O<sub>16</sub><sup>+</sup> [M]<sup>+</sup>, 2113.8230; found, 2113.8234.

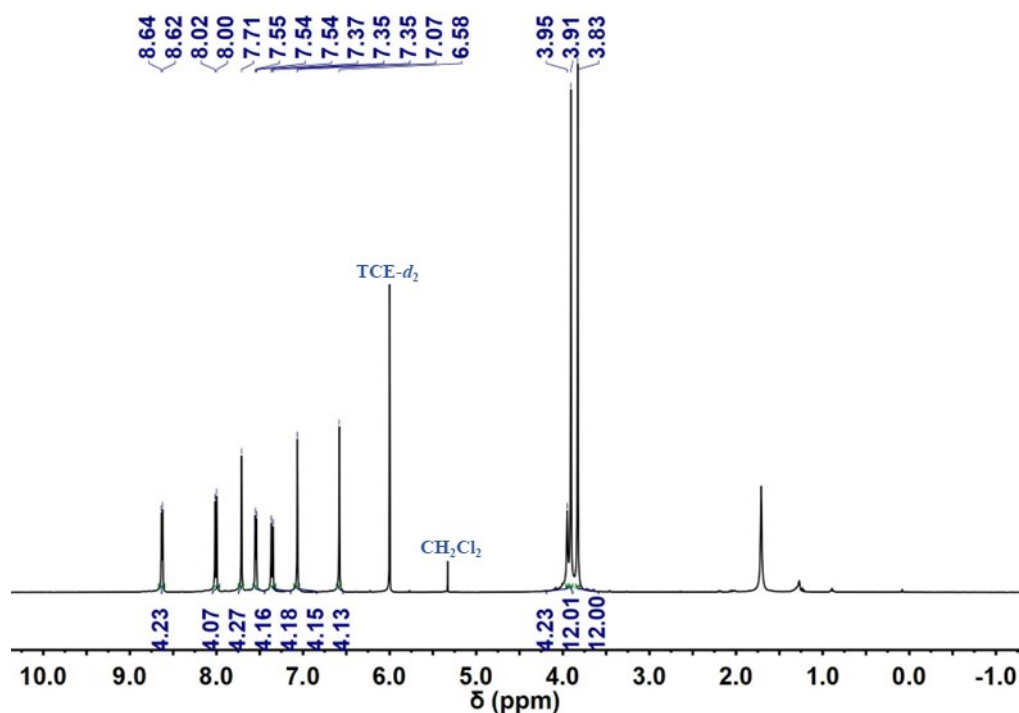

**Figure S4.** <sup>1</sup>H NMR spectrum (400 MHz, TCE-*d*<sub>2</sub>, 298 K) of **PyC[2]**.

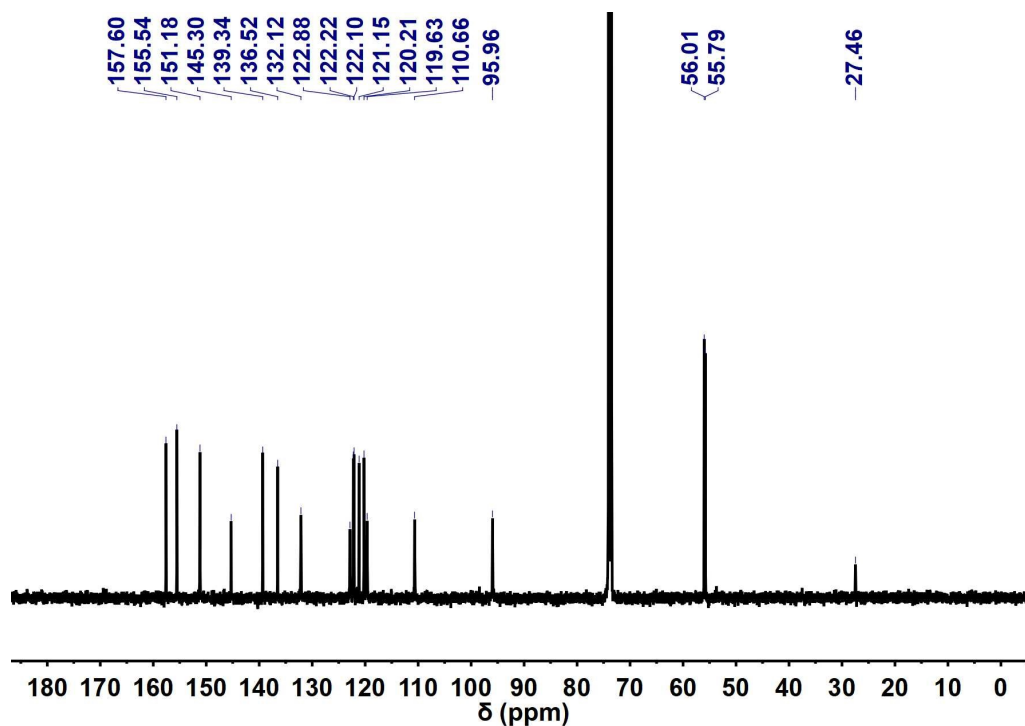

Figure S5.  $^{13}\text{C}$  NMR spectrum (100 MHz,  $\text{TCE-d}_2$ , 298 K) of PyC[2].

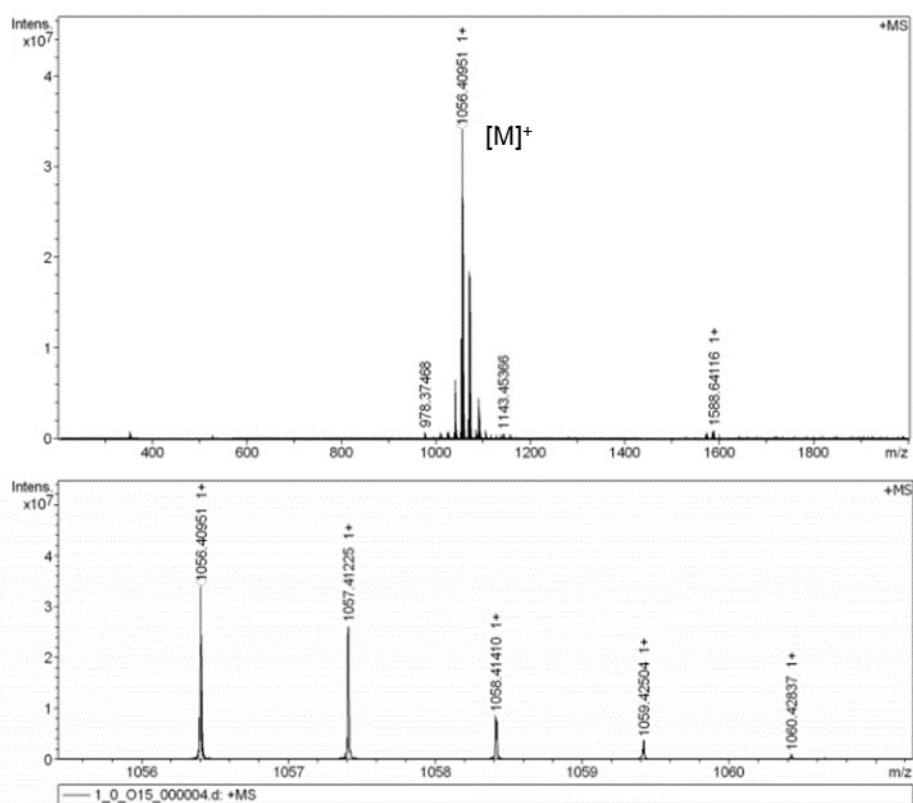

Figure S6. HRMS of PyC[2].

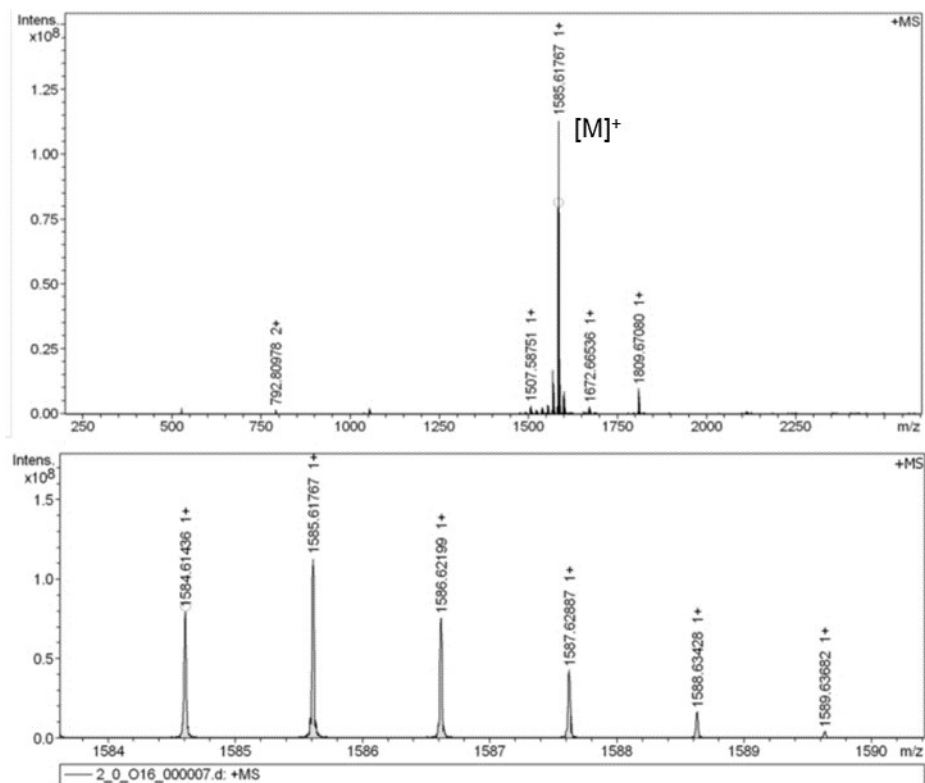

Figure S7. HRMS of PyC[3].

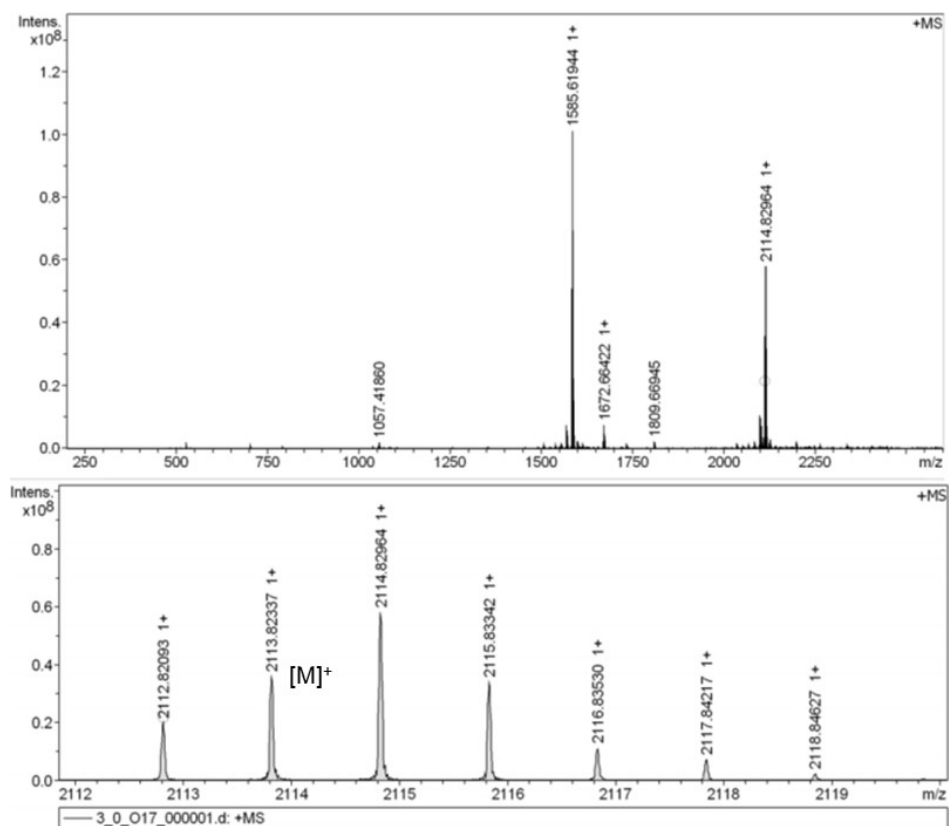

Figure S8. HRMS of PyC[4].

**Table S1.** Reaction conditions screening for **PyC[2]**.

| Entry | Catalysts                          | Equivalent of Catalysts | Solvents <sup>[b]</sup> | Temperature (°C) | Reaction time <sup>[c]</sup> | Yields (%) <sup>[d]</sup> |
|-------|------------------------------------|-------------------------|-------------------------|------------------|------------------------------|---------------------------|
| 1     | TfOH                               | 1.2 <sup>[a]</sup>      | DCE                     | 25               | 8 min                        | 75                        |
| 2     | TfOH                               | 0.6                     | DCE                     | 25               | 7 h                          | 58                        |
| 3     | <i>p</i> -TsOH                     | 30 <sup>[a]</sup>       | DCE                     | 25               | 30 min                       | 37                        |
| 4     | <i>p</i> -TsOH                     | 3.0                     | DCE                     | 25               | 10 h                         | – <sup>[e]</sup>          |
| 5     | CF <sub>3</sub> COOH               | 0.67 <sup>[a]</sup>     | DCE                     | 25               | 12 h                         | 12                        |
| 6     | CH <sub>3</sub> COOH               | 315                     | DCE                     | 25               | >12 h                        | – <sup>[e]</sup>          |
| 7     | AlCl <sub>3</sub>                  | 23 <sup>[a]</sup>       | DCE                     | 25               | 60 min                       | 7                         |
| 8     | FeCl <sub>3</sub>                  | 4.0 <sup>[a]</sup>      | DCE                     | 25               | 20 min                       | 43                        |
| 9     | BF <sub>3</sub> ·Et <sub>2</sub> O | 4.2 <sup>[a]</sup>      | DCE                     | 25               | 20 min                       | 23                        |
| 10    | TfOH                               | 4.7 <sup>[a]</sup>      | TCE                     | 25               | 30 min                       | 10                        |
| 11    | TfOH                               | 5.8 <sup>[a]</sup>      | DCM                     | 25               | 40 min                       | 49                        |
| 12    | TfOH                               | 1.2 <sup>[a]</sup>      | CHCl <sub>3</sub>       | 25               | 20 min                       | 72                        |
| 13    | TfOH                               | 7.0 <sup>[a]</sup>      | CH <sub>3</sub> CN      | 25               | 30 min                       | 30                        |
| 14    | TfOH                               | 1.2                     | DCE                     | 0                | 20 min                       | – <sup>[e]</sup>          |
| 15    | TfOH                               | 1.2                     | DCE                     | 40               | 2 min                        | 62                        |
| 16    | TfOH                               | 1.2                     | DCE                     | 60               | 1.5 min                      | 54                        |
| 17    | TfOH                               | 1.2                     | DCE                     | 25               | 40 min                       | 61                        |
| 18    | TfOH                               | 1.2                     | DCE                     | 25               | 60 min                       | 50                        |
| 19    | TfOH                               | 1.2                     | DCE                     | 25               | 6 h                          | 43                        |
| 20    | TfOH                               | 1.2                     | DCE                     | 25               | 24 h                         | – <sup>[e]</sup>          |

[a] The ratio of catalyst is optimal for given conditions. We change the ratios of catalysts and monitor the reaction to determine a best ratio; [b] DCE: 1,2-dichloroethane; DCM: dichloromethane; TCE: 1,1,2,2-tetrachloroethane; CH<sub>3</sub>CN; CHCl<sub>3</sub>; [c] The reaction time is optimal for given conditions; [d] Yield of isolated product; [e] Not detected.

### Syntheses of noncyclic dimer

To the solution of **PyCM** (0.47 g, 0.91 mmol) and paraformaldehyde (0.041 g, 1.37 mmol) in DCE (200 mL) was added TfOH (97  $\mu$ L, 1.1 mmol) and stirred at 25 °C for 5 minutes. After quenching by 100 mL water, the organic phase was separated and washed with saturated NaHCO<sub>3</sub> solution. The organic layer was dried over anhydrous Na<sub>2</sub>SO<sub>4</sub> and evaporated. The residue was purified by column chromatography with CH<sub>2</sub>Cl<sub>2</sub>: EA: MeOH (2:1:0.1, V:V:V) as eluent to afford noncyclic dimer as white



powder (0.40 g, 85%).

**Noncyclic dimer:**  $^1\text{H}$  NMR (400 MHz,  $\text{TCE-}d_2$ ):  $\delta$  8.82 (s, 4H), 8.11 (dd,  $J = 8.1, 5.5$  Hz, 4H), 7.71 (d,  $J = 36.6$  Hz, 8H), 7.51 (m, 4H), 7.35 (d,  $J = 8.9$  Hz, 2H), 7.19 (s, 2H), 6.64 – 6.58 (m, 4H), 6.56 (s, 2H), 3.92 (s, 2H), 3.89 – 3.77 (m, 24H).  $^{13}\text{C}$  NMR (100 MHz,  $\text{TCE-}d_2$ ):  $\delta$  (ppm): 160.10, 157.59, 157.31, 155.58, 150.91, 139.43, 139.38, 136.91, 136.50, 132.76, 131.50, 123.38, 123.31, 123.23, 122.37, 122.22, 122.20, 121.41, 120.93, 120.57, 119.63, 110.58, 104.69, 99.04, 95.65, 56.03, 55.65, 55.42. HRMS ( $m/z$ ): calcd. for  $\text{C}_{67}\text{H}_{58}\text{N}_4\text{O}_8^{2+}$ , 523.2122  $[\text{M}+2\text{H}]^{2+}$ , found, 523.2142; calcd. for  $\text{C}_{67}\text{H}_{56}\text{NaO}_8^+$ , 1067.3990  $[\text{M}+\text{Na}]^+$ , found, 1067.3996.

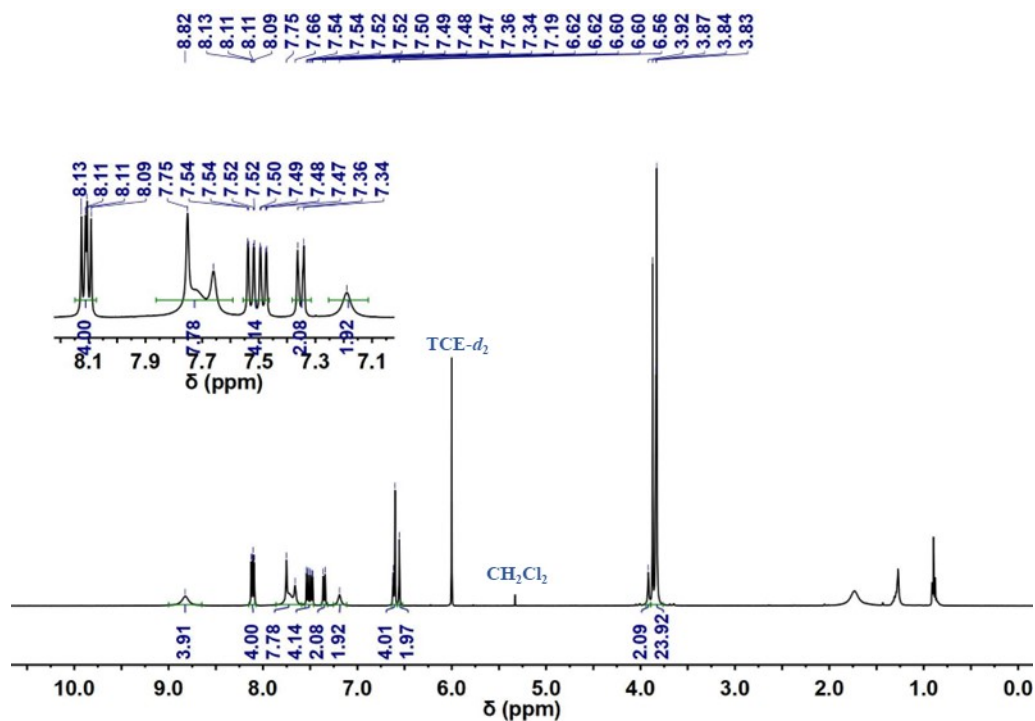

**Figure S9.**  $^1\text{H}$  NMR spectrum (400 MHz,  $\text{TCE-}d_2$ , 298 K) of noncyclic dimer.

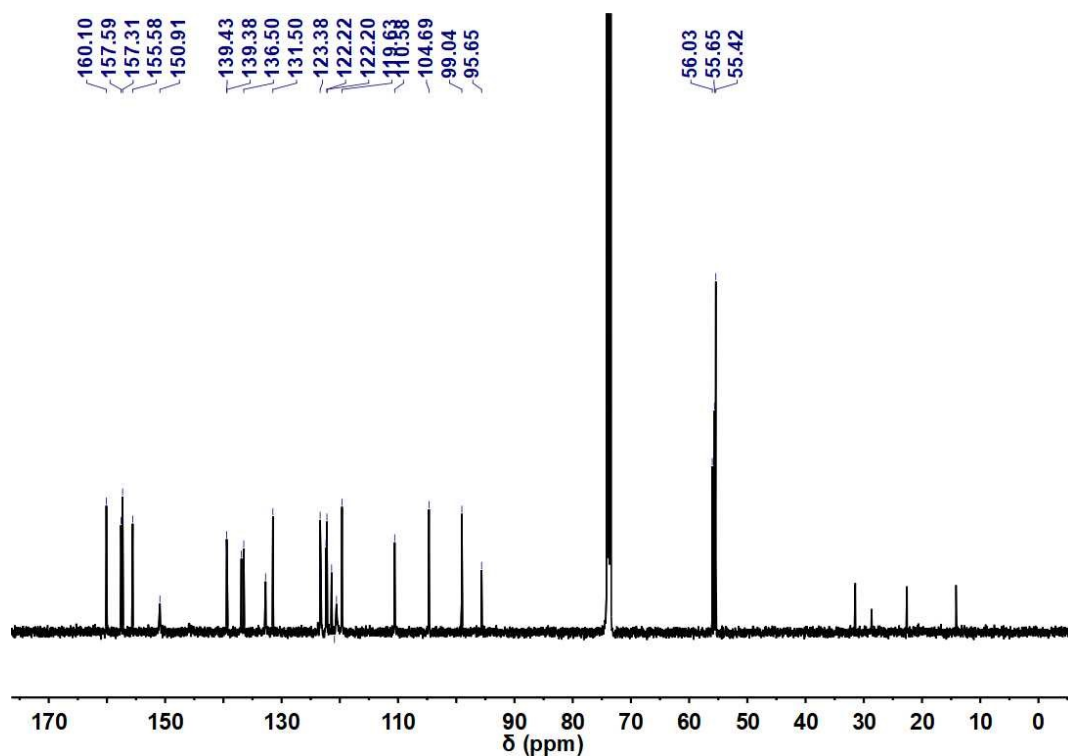

**Figure S10.**  $^{13}\text{C}$  NMR spectrum (100 MHz,  $\text{TCE-}d_2$ , 298 K) of noncyclic dimer.

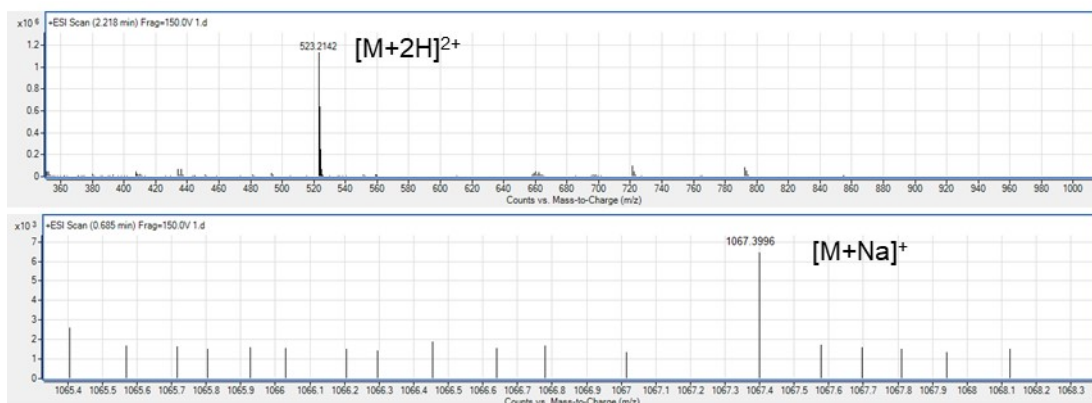

**Figure S11.** HRMS of noncyclic dimer.

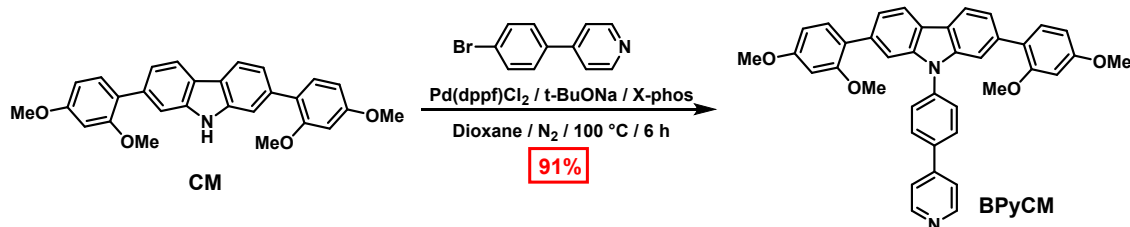

**Scheme S2.** Synthesis of phenylpyridylcarbazole monomer (**BPyCM**).

The **BPyCM** was synthesized by similar procedure of **PyCM** in yield of 91%.

**BPyCM**:  $^1\text{H}$  NMR (400 MHz,  $\text{CDCl}_3$ ):  $\delta$  (ppm): 8.72 – 8.70 (m, 2H), 8.14 (d,  $J = 8.1$  Hz, 2H), 7.84 (d,  $J = 8.6$  Hz, 2H), 7.76 (d,  $J = 8.6$  Hz, 2H), 7.60 – 7.56 (m, 4H), 7.47 (dd,  $J = 8.1, 1.4$  Hz, 2H), 7.31 (d,  $J = 8.8$  Hz, 2H), 6.59 – 6.55 (m, 4H), 3.85 (s, 6H), 3.81 (s, 6H).  $^{13}\text{C}$  NMR (100 MHz,  $\text{CDCl}_3$ ):  $\delta$ (ppm): 160.35, 157.60, 150.41, 147.56, 141.09, 138.96, 136.62, 136.40, 131.68, 128.45, 127.61, 124.32, 122.41, 122.31, 121.63, 119.74, 110.57, 104.73, 99.18, 55.74, 55.52. HRMS (m/z): calcd. for  $\text{C}_{39}\text{H}_{33}\text{N}_2\text{O}_4^+$ , 593.2435  $[\text{M}+\text{H}]^+$ , found, 593.2454.

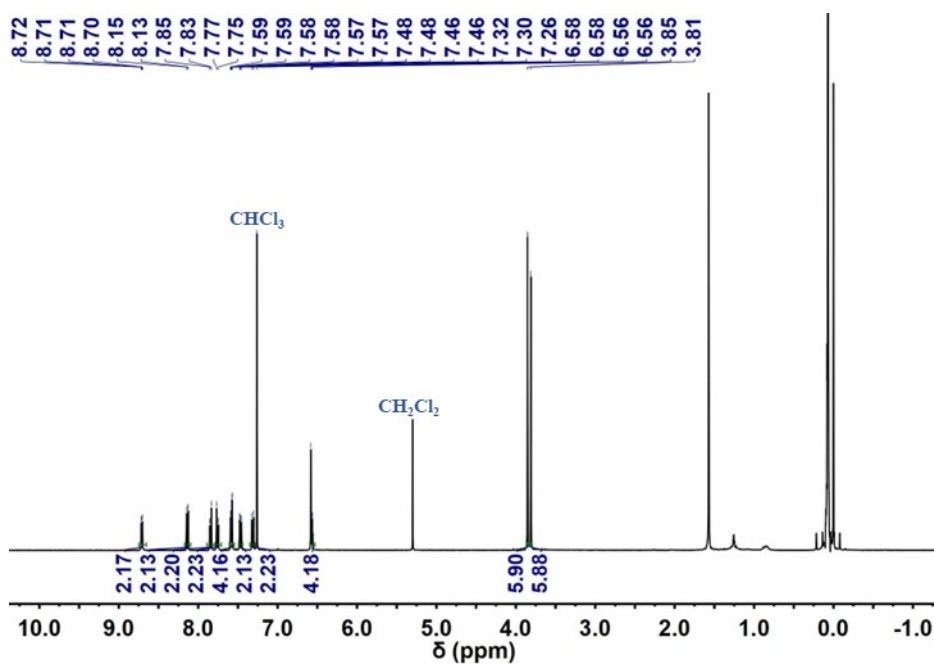

**Figure S12.**  $^1\text{H}$  NMR spectrum (400 MHz,  $\text{CDCl}_3$ , 298 K) of **BPyCM**.

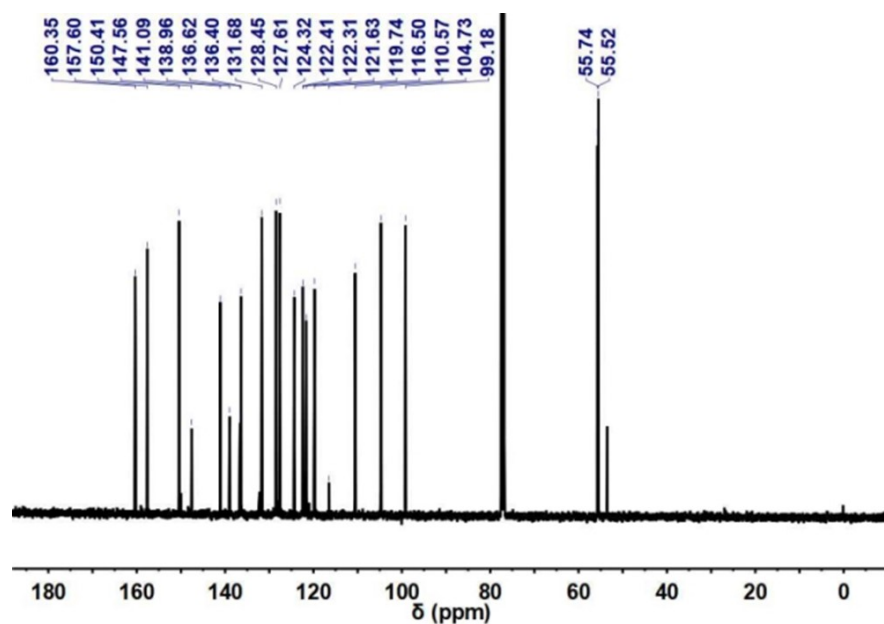

**Figure S13.**  $^{13}\text{C}$  NMR spectrum (100 MHz,  $\text{CDCl}_3$ , 298 K) of **BPyCM**.

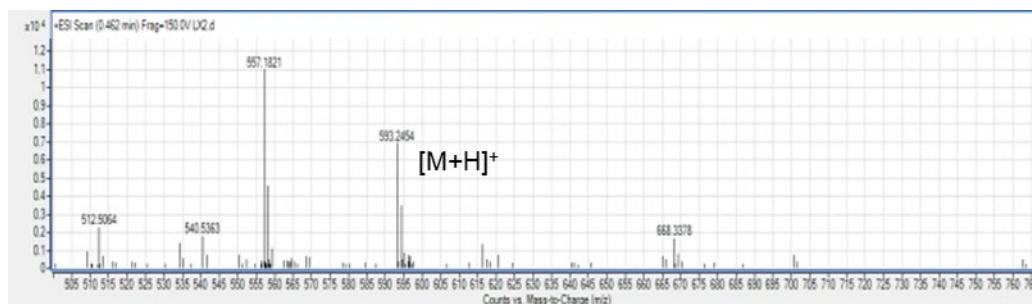

**Figure S14.** HRMS of **BPyCM**.

### Synthesis of **BPyC[3]**.

To the solution of **BPyCM** (0.47 g, 0.79 mmol) and paraformaldehyde (36 mg, 1.2 mmol) in DCE (200 mL) was added TfOH (61  $\mu\text{mL}$ , 0.69 mmol) and stirred at 25  $^\circ\text{C}$  for 6 h. After quenching by 100 mL water, the organic phase was separated and washed with saturated  $\text{NaHCO}_3$  solution. The organic layer was dried over anhydrous  $\text{Na}_2\text{SO}_4$  and evaporated. The residue was purified by column chromatography with  $\text{CH}_2\text{Cl}_2$ : EA: MeOH (1:1:0.1, V:V:V) as eluent to afford **BPyC[3]** as white powder (0.26 g, 56%).

**BPyC[3]**:  $^1\text{H}$  NMR (400 MHz,  $\text{CDCl}_3$ ):  $\delta$  (ppm): 8.36 (d,  $J = 6.1$  Hz, 6H), 7.94 (d,  $J = 8.1$  Hz, 6H), 7.43-7.39 (m, 12H), 7.36 – 7.32 (m, 12H), 7.02 (d,  $J = 6.1$  Hz 6H), 6.97 (s, 6H), 6.56 (s, 6H), 3.93 (s, 6H), 3.87 (s, 18H), 3.76 (s, 18H).  $^{13}\text{C}$  NMR (100 MHz,  $\text{CDCl}_3$ ):  $\delta$  (ppm): 157.76, 155.65, 149.31, 147.21, 140.31, 138.58, 136.46, 135.67, 132.48, 128.31, 126.44, 123.25, 122.39, 122.03, 121.71, 121.20, 119.51, 110.49, 96.03,

56.04, 55.87, 29.73. HRMS (m/z): calcd. for  $C_{120}H_{96}N_6NaO_{12}^+$   $[M+Na]^+$ , 1836.7012; found, 1836.7019.

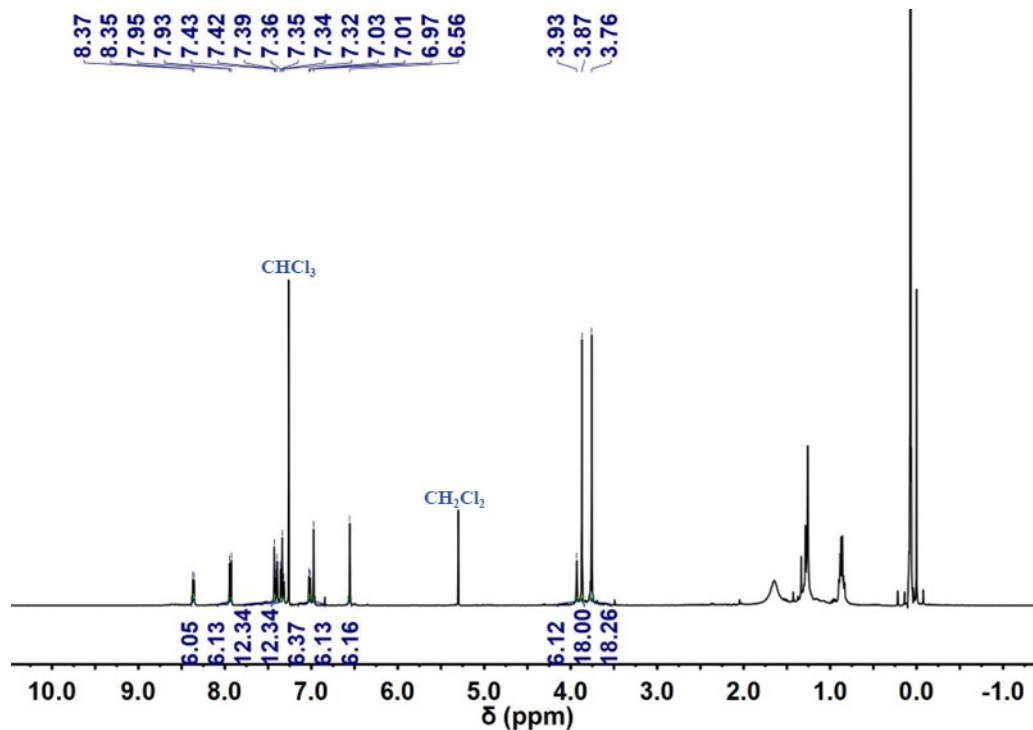

Figure S15.  $^1H$  NMR spectrum (400 MHz,  $CDCl_3$ , 298 K) of **BPyC[3]**.

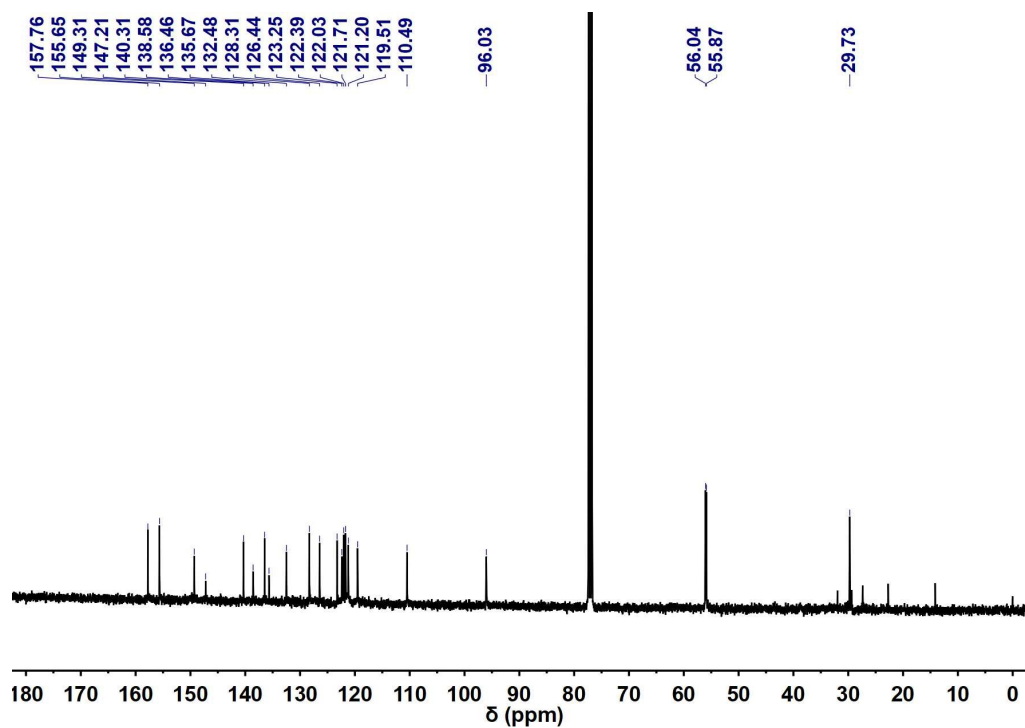

Figure S16.  $^{13}C$  NMR spectrum (100 MHz,  $CDCl_3$ , 298 K) of **BPyC[3]**.

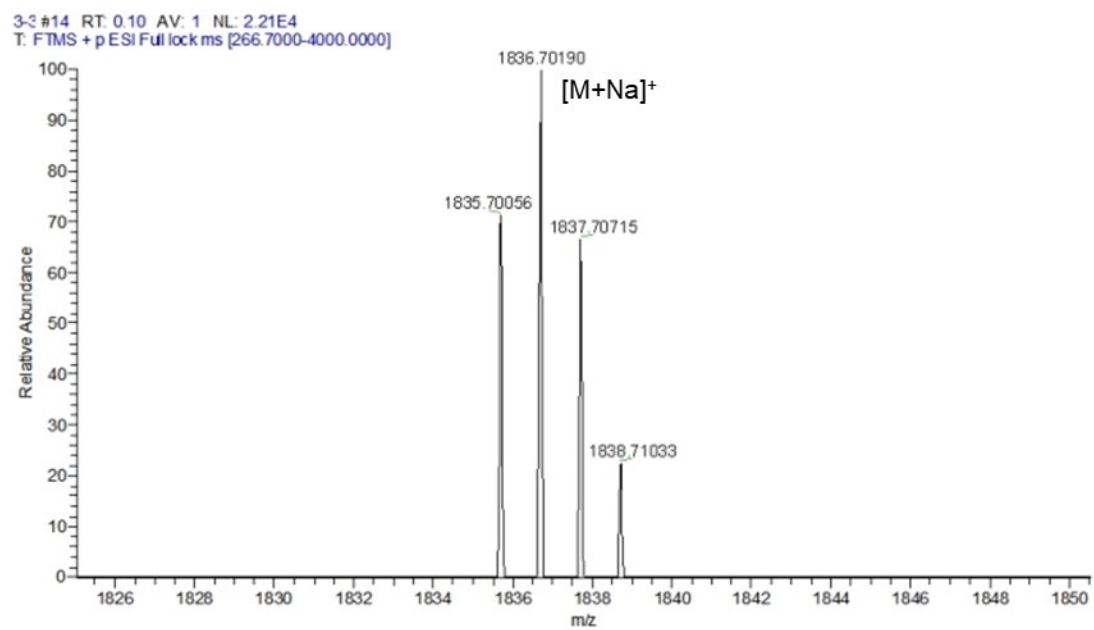

**Figure S17.** HRMS of BPyC[3].

### Section III. Photophysical Properties and Single-crystal Data

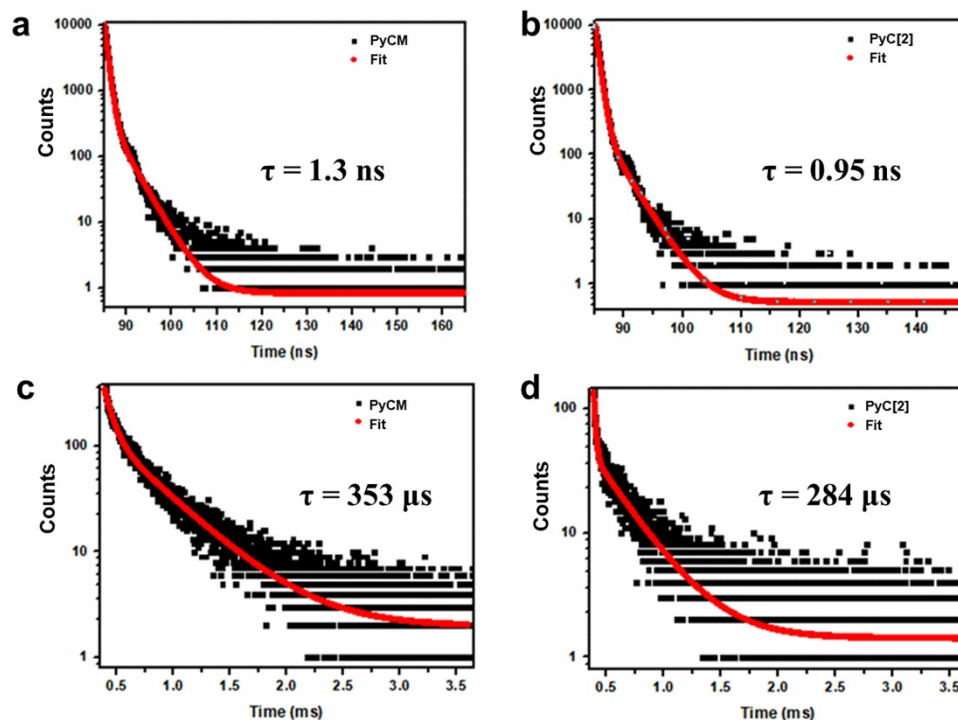

**Figure S18.** Time-resolved PL decay of (a) PyCM (@ 400 nm), (b) PyC[2] (@ 400 nm), (c) PyCM (@ 515 nm), and (d) PyC[2] (@ 515 nm) in the solid state at room temperature.

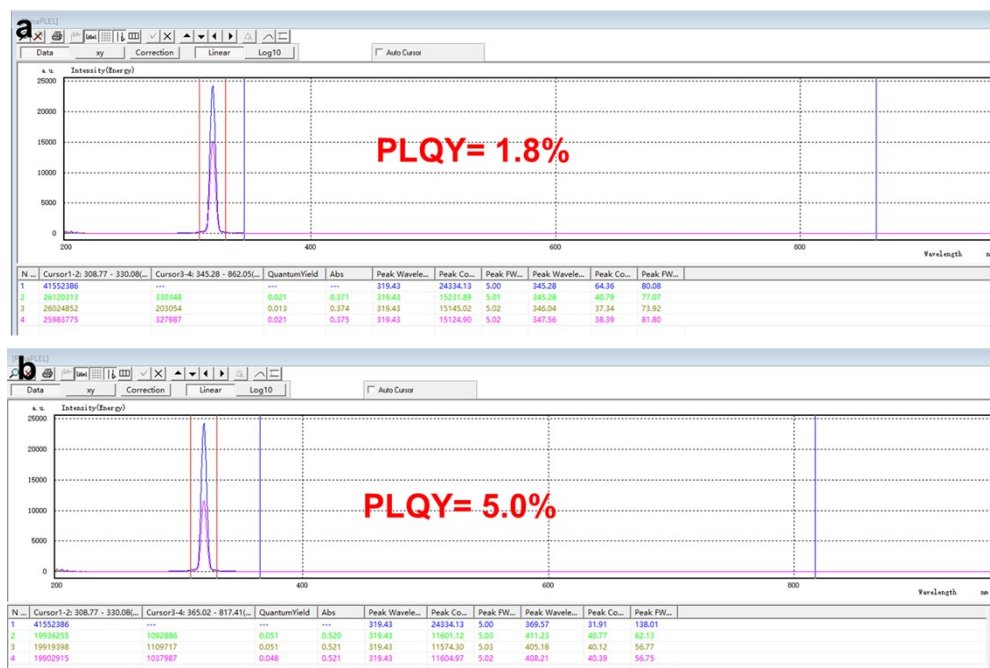

**Figure S19.** The photoluminescence quantum yields of (a) PyC[2] and (b) PyCM.

**Crystal structure of PyC[2] (CCDC: 2281404) and PyCM (CCDC: 2281407).**

**Table S2.** Crystal data of PyC[2] and PyCM.

| CCDC number                                     | 2281404                                                       | 2281407                                                       |
|-------------------------------------------------|---------------------------------------------------------------|---------------------------------------------------------------|
| Name                                            | PyC[2]                                                        | PyCM                                                          |
| Empirical formula                               | C <sub>68</sub> H <sub>56</sub> N <sub>4</sub> O <sub>8</sub> | C <sub>33</sub> H <sub>28</sub> N <sub>2</sub> O <sub>4</sub> |
| Formula weight                                  | 1057.16                                                       | 516.57                                                        |
| Temperature / K                                 | 150.15                                                        | 170.0                                                         |
| Wavelength/ Å                                   | 1.54178                                                       | 0.71073                                                       |
| Crystal system                                  | monoclinic                                                    | triclinic                                                     |
| Space group                                     | C2/c                                                          | P -1                                                          |
| a / Å                                           | 31.9126(9)                                                    | 9.126(3)                                                      |
| b / Å                                           | 18.7706(7)                                                    | 11.832(3)                                                     |
| c / Å                                           | 24.7876(8)                                                    | 25.192(6)                                                     |
| $\alpha$ / °                                    | 90                                                            | 98.152(13)                                                    |
| $\beta$ / °                                     | 94.958(2)                                                     | 95.551(9)                                                     |
| $\gamma$ / °                                    | 90                                                            | 101.380(10)                                                   |
| Volume/ Å <sup>3</sup>                          | 14792.7(8)                                                    | 2617.9(12)                                                    |
| Z                                               | 8                                                             | 4                                                             |
| Density (calculated)                            | 0.949 g/cm <sup>3</sup>                                       | 1.311 g/cm <sup>3</sup>                                       |
| Absorption coefficient                          | 0.502 mm <sup>-1</sup>                                        | 0.087 mm <sup>-1</sup>                                        |
| F(000)                                          | 4448.0                                                        | 1088.0                                                        |
| Crystal size                                    | 0.07 × 0.05 × 0.04 mm <sup>3</sup>                            | 0.08 × 0.05 × 0.03 mm <sup>3</sup>                            |
| 2 $\theta$ range for data collection / °        | 5.468 to 118.276                                              | 4.162 to 50.748                                               |
| Index ranges                                    | -34 ≤ h ≤ 35<br>-20 ≤ k ≤ 20<br>-27 ≤ l ≤ 27                  | -10 ≤ h ≤ 10,<br>-14 ≤ k ≤ 14,<br>-30 ≤ l ≤ 30                |
| Reflections collected                           | 46774                                                         | 25859                                                         |
| Independent reflections                         | 10546 [R(int) = 0.1370]                                       | 9425 [R(int) = 0.1161]                                        |
| Data / restraints / parameters                  | 10546/14/730                                                  | 9425/0/711                                                    |
| Goodness-of-fit on F <sup>2</sup>               | 1.291                                                         | 1.027                                                         |
| Final R indices [I > 2 $\sigma$ (I)]            | R <sub>1</sub> = 0.1283<br>wR <sub>2</sub> = 0.3731           | R <sub>1</sub> = 0.0787<br>wR <sub>2</sub> = 0.1437           |
| R indices (all data)                            | R <sub>1</sub> = 0.1722<br>wR <sub>2</sub> = 0.4018           | R <sub>1</sub> = 0.2065<br>wR <sub>2</sub> = 0.2027           |
| Largest diff. peak and hole / e.Å <sup>-3</sup> | 0.53/-0.36                                                    | 0.63/-0.31                                                    |



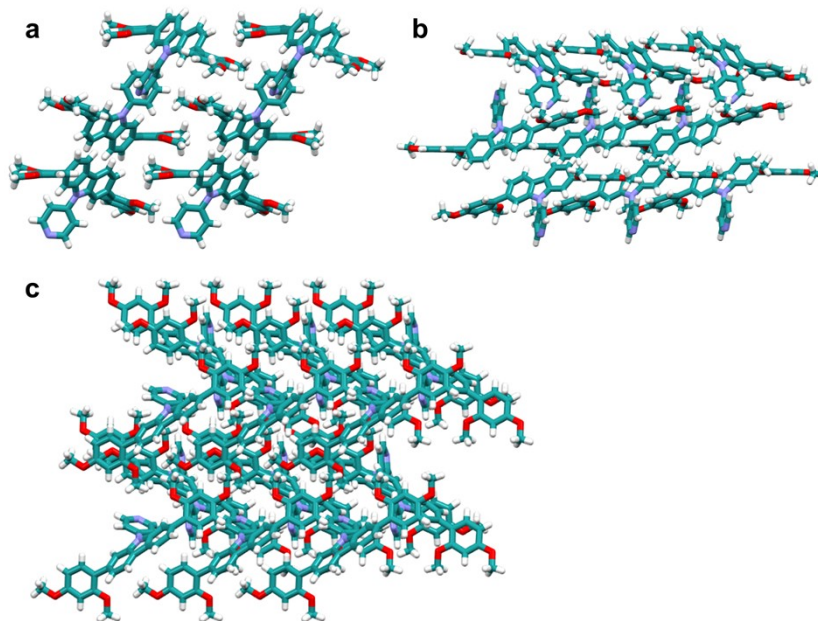

**Figure S20.** Single-crystal structures and superstructures of **PyCM** view along (a) a axis, (b) b axis, and (c) c axis.

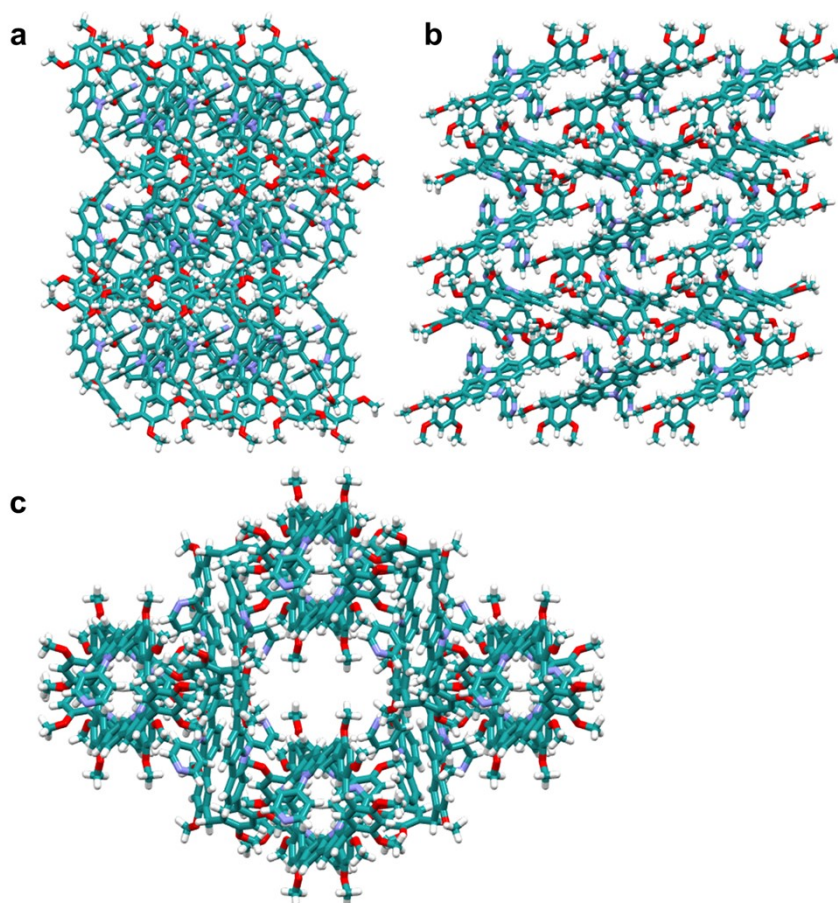

**Figure S21.** Single-crystal structures and superstructures of **PyC[2]** view along (a) a axis, (b) b axis, and (c) c axis.

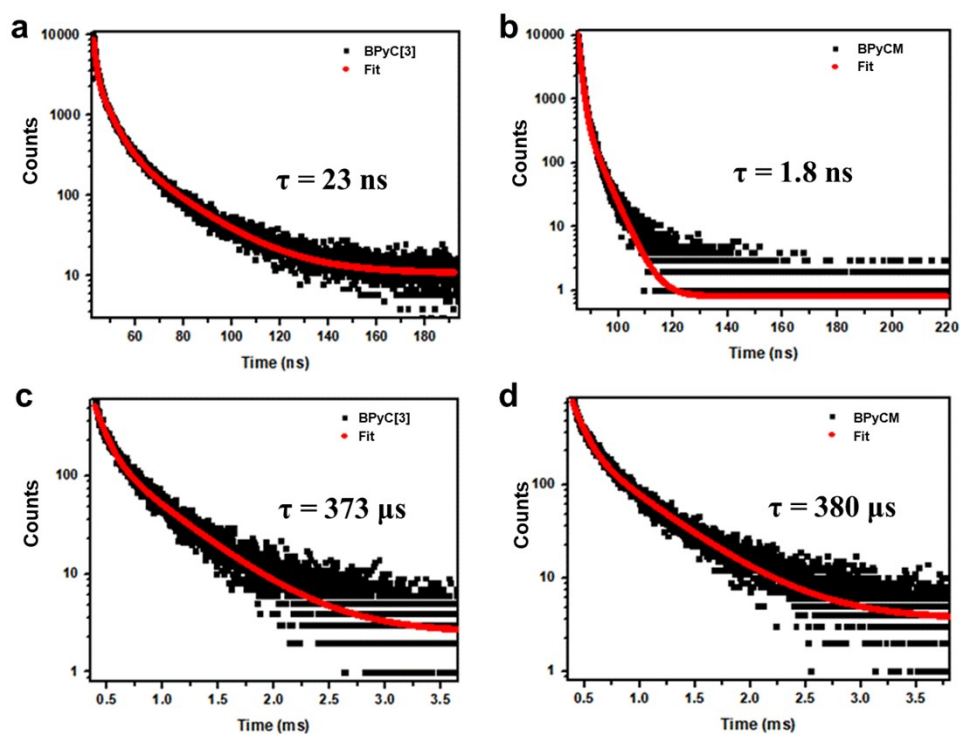

**Figure S22.** Time-resolved PL decay of (a) BPyC[3] (@ 594 nm), (b) BPyCM (@ 407 nm), (c) BPyC[3] (@ 582 nm), and (d) BPyCM (@ 596 nm) in the solid state at room temperature.

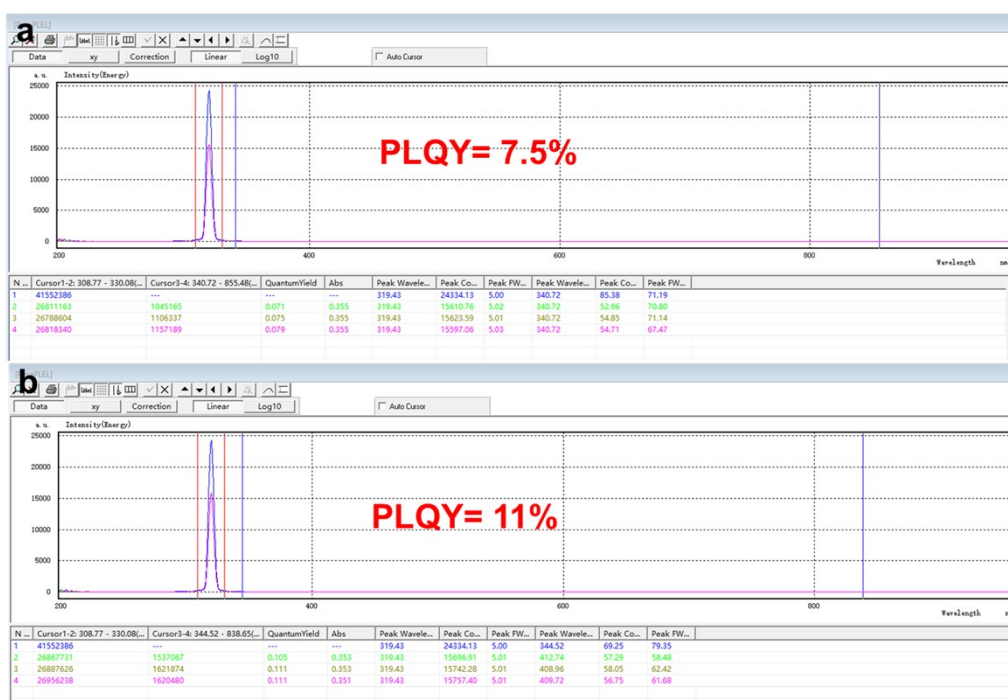

**Figure S23.** The photoluminescence quantum yields of (a) BPyC[3] and (b) BPyCM.

**Table S3.** Photophysical data of skeleton preorganization macrocycles and monomers.

| Entry | Compound       | $\lambda_F$ (nm) | $\lambda_P$ (nm) | $\tau_F$ (ns) | $\tau_P$ ( $\mu$ s) | $\Phi_{PL}$ (%) |
|-------|----------------|------------------|------------------|---------------|---------------------|-----------------|
| 1     | <b>PyC[2]</b>  | 400              | 515              | 0.95          | 284                 | 1.8             |
| 2     | <b>PyCM</b>    | 400              | 515              | 1.3           | 353                 | 5.0             |
| 3     | <b>BPyc[3]</b> | 594              | 582              | 23            | 373                 | 7.5             |
| 4     | <b>BPycM</b>   | 407              | 596              | 1.8           | 380                 | 11              |

#### Section IV. References:

1. Dolomanov, O.V., Bourhis, L.J., Gildea, R.J, Howard, J.A.K. & Puschmann, H. *J. Appl. Cryst.* **2009**, *42*, 339-341.
2. Sheldrick, G.M. *Acta Cryst.* **2015**, *A71*, 3-8.
3. Sheldrick, G.M. *Acta Cryst.* **2015**, *C71*, 3-8.
4. MOPAC2016, James J. P. Stewart, *Stewart Computational Chemistry*, Colorado Springs, CO, USA, **2016**, [HTTP://OpenMOPAC.net](http://OpenMOPAC.net).
5. Stewart J. J. P., Optimization of parameters for semiempirical methods VI: more modifications to the NDDO approximations and re-optimization of parameters. *J. Mol. Modeling.* **2013**, *19*, 1-32.
6. Dong, M.; Liu, X.; Zhang, Z.-Y.; Yu, C.; Huo, B.; Li, C. Synthesis of a large-cavity carbazole macrocycle for size-dependent recognition. *Chem. Commun.* **2022**, *58*, 2319-2322.
